# Supplementary material for: E-cigarette use and combustible tobacco cigarette smoking uptake among non-smokers, including relapse in former smokers: umbrella review, systematic review and meta-analysis
Source: PubMed Central journal article supplement — BMJ Open. 2021 Mar 30;11(3):e045603. doi: 10.1136/bmjopen-2020-045603 (PMC8011717; doi:10.1136/bmjopen-2020-045603), 2021-03-30
Supplement: bmjopen-2020-045603supp001.pdf [file bmjopen-2020-045603supp001.pdf]

## Supporting Information

**Supplementary Table 1: Inclusion and exclusion criteria for umbrella review (of systematic reviews) and systematic review (of primary research)**

| PICO                | Inclusion Criteria                                                                                                                                                                                                                                                                                                                                                                                                                                                                                                                                                                                                                                                                                                       | Exclusion Criteria                                                                                                                                                                                                                                                                                                                                                                                                                                                                                                                                                                                                                                                                                                                                       |
|---------------------|--------------------------------------------------------------------------------------------------------------------------------------------------------------------------------------------------------------------------------------------------------------------------------------------------------------------------------------------------------------------------------------------------------------------------------------------------------------------------------------------------------------------------------------------------------------------------------------------------------------------------------------------------------------------------------------------------------------------------|----------------------------------------------------------------------------------------------------------------------------------------------------------------------------------------------------------------------------------------------------------------------------------------------------------------------------------------------------------------------------------------------------------------------------------------------------------------------------------------------------------------------------------------------------------------------------------------------------------------------------------------------------------------------------------------------------------------------------------------------------------|
| <b>Population</b>   | Non-tobacco smokers - includes never, former or ever users (this includes prior users who have tried smoking but have not used in the past 30 days)<br><br>Humans, any age (youth, young adults and adults)                                                                                                                                                                                                                                                                                                                                                                                                                                                                                                              | Current tobacco smokers (use within the past 30 days)<br><br>Animal studies, in vitro studies                                                                                                                                                                                                                                                                                                                                                                                                                                                                                                                                                                                                                                                            |
| <b>Intervention</b> | Nicotine-containing or non-nicotine-containing e-cigarettes or e-liquid devices (also referred to as vaping products)                                                                                                                                                                                                                                                                                                                                                                                                                                                                                                                                                                                                    | Studies with a focus on heat-not-burn or tobacco containing devices<br><br>Studies with a focus on the uptake of marijuana, other illicit drugs and harmful substances (as in the CSIRO report [58])                                                                                                                                                                                                                                                                                                                                                                                                                                                                                                                                                     |
| <b>Comparison</b>   | No nicotine-containing or non-nicotine containing e-cigarettes or e-liquid devices                                                                                                                                                                                                                                                                                                                                                                                                                                                                                                                                                                                                                                       |                                                                                                                                                                                                                                                                                                                                                                                                                                                                                                                                                                                                                                                                                                                                                          |
| <b>Outcomes</b>     | Ever smoking combustible tobacco cigarettes                                                                                                                                                                                                                                                                                                                                                                                                                                                                                                                                                                                                                                                                              | Studies where smoking cigarettes is not the primary outcome variable                                                                                                                                                                                                                                                                                                                                                                                                                                                                                                                                                                                                                                                                                     |
| <b>Study</b>        | Published, peer-reviewed literature<br><br>For umbrella review <ul style="list-style-type: none"> <li>- Systematic reviews and meta-analyses of randomised/non-randomised controlled trials, clinical trials and prospective cohort studies (if a systematic review/meta-analysis includes study designs other than cohort and randomised/ non-randomised controlled trials, the review will only be included if the analysis and/ or results are separated by study design)</li> </ul> For systematic review <ul style="list-style-type: none"> <li>- Randomised/ non-randomised controlled trials, clinical trials (although interventional studies are not expected)</li> <li>- Prospective cohort studies</li> </ul> | Systematic reviews that are superseded by a later review which include all studies from the earlier review.<br><br><ul style="list-style-type: none"> <li>- Non-systematic -literature reviews</li> <li>- Intervention trial with no comparator (e.g. before and after study)</li> <li>- Qualitative studies</li> <li>- Retrospective cohort studies</li> <li>- Case-control studies</li> <li>- Cross-sectional (including repeated cross-sectional)</li> <li>- Case studies</li> <li>- Grey literature, conference abstracts, letters, editorials, correspondence, opinion pieces, government reports, position statements</li> </ul> <p><i>Systematic reviews and meta-analyses will be excluded if they include only the above study designs.</i></p> |
| <b>Follow-up</b>    | Minimum 6 months                                                                                                                                                                                                                                                                                                                                                                                                                                                                                                                                                                                                                                                                                                         |                                                                                                                                                                                                                                                                                                                                                                                                                                                                                                                                                                                                                                                                                                                                                          |
| <b>Setting</b>      | Any country                                                                                                                                                                                                                                                                                                                                                                                                                                                                                                                                                                                                                                                                                                              |                                                                                                                                                                                                                                                                                                                                                                                                                                                                                                                                                                                                                                                                                                                                                          |
| <b>Time period</b>  | All years                                                                                                                                                                                                                                                                                                                                                                                                                                                                                                                                                                                                                                                                                                                | No exclusion                                                                                                                                                                                                                                                                                                                                                                                                                                                                                                                                                                                                                                                                                                                                             |
| <b>Other</b>        | <ul style="list-style-type: none"> <li>- English</li> <li>- Full-text availability</li> </ul>                                                                                                                                                                                                                                                                                                                                                                                                                                                                                                                                                                                                                            | <ul style="list-style-type: none"> <li>- Not available in English</li> <li>- Duplicated data</li> </ul>                                                                                                                                                                                                                                                                                                                                                                                                                                                                                                                                                                                                                                                  |

## Supplementary Appendix: Search strategy

MEDLINE, PyschINFO, PubMed, Scopus, Web of Science and Cochrane Library were searched. Papers were imported into an Endnote library, exported to Covidence and duplicates removed. The titles and abstracts were screened by two reviewers (OB and LF) to isolate relevant publications. Full texts were then identified for the relevant publications by two reviewers (OB and LF) and independently assessed the publications against the selection criteria. Any conflicts were discussed and if no consensus was reached the publication was reviewed by a third reviewer (MH).

A forward and backward reference search was performed on the final articles completed using Web of Science and Scopus. After removing duplicates, titles, abstracts and then full texts were screened for any randomised controlled trials fulfilling our inclusion and exclusion criteria by two reviewers (OB and LF).

Data were systematically extracted from the publications using data extraction templates. The quality of the included studies was assessed independently by two reviewers (OB and LF), with discrepancies resolved by discussion and by adjudication of a third reviewer (EB). E-cigarette, cigarette smoking and uptake search terms will be combined with the Boolean operator 'AND' for the final search.

### Supplementary Table 2: Search terms

| E-cigarette related search terms (combined with Boolean operator 'OR')                                                                                                                                                                                                                                                                                                    | Combustible <b>cigarette smoking</b> related search terms (combined with Boolean operator 'OR')                                                  | Uptake related search terms (combined with Boolean operator 'OR')                                                                               |
|---------------------------------------------------------------------------------------------------------------------------------------------------------------------------------------------------------------------------------------------------------------------------------------------------------------------------------------------------------------------------|--------------------------------------------------------------------------------------------------------------------------------------------------|-------------------------------------------------------------------------------------------------------------------------------------------------|
| <u>Keywords</u>                                                                                                                                                                                                                                                                                                                                                           | <u>Keywords</u>                                                                                                                                  | <u>Keywords</u>                                                                                                                                 |
| <ol style="list-style-type: none"> <li>1. Electronic cigarette*</li> <li>2. E-cigarette*</li> <li>3. Electronic nicotine delivery system*</li> <li>4. Electronic nicotine de*</li> <li>5. Electronic non-nicotine de*</li> <li>6. Vape</li> <li>7. Vaping</li> <li>8. Vapo*</li> <li>9. E-hookah</li> <li>10. Electronic inhalant device</li> <li>11. E-liquid</li> </ol> | <ol style="list-style-type: none"> <li>1. Combustible cigarette</li> <li>2. Tobacco smoking</li> <li>3. Smoking</li> <li>4. Cigarette</li> </ol> | <ol style="list-style-type: none"> <li>1. Initiat*</li> <li>2. Uptak*</li> <li>3. Subsequent*</li> <li>4. Predict*</li> <li>5. Onset</li> </ol> |
| <u>MeSH terms</u>                                                                                                                                                                                                                                                                                                                                                         | <u>MeSH terms</u>                                                                                                                                |                                                                                                                                                 |
| <ol style="list-style-type: none"> <li>1. Electronic Nicotine Delivery Systems (ENDS)</li> </ol>                                                                                                                                                                                                                                                                          | <ol style="list-style-type: none"> <li>1. Smokers</li> <li>2. Non-smokers</li> </ol>                                                             |                                                                                                                                                 |

## Supplementary Table 3: Search histories

| Database         | Search                                                                                                                                                                                                                                                                                                                                                                                                                                                                                                                                                                                               | Studies and search date |
|------------------|------------------------------------------------------------------------------------------------------------------------------------------------------------------------------------------------------------------------------------------------------------------------------------------------------------------------------------------------------------------------------------------------------------------------------------------------------------------------------------------------------------------------------------------------------------------------------------------------------|-------------------------|
| PubMed           | ((Electronic cigarette* or E-cigarette* or Electronic nicotine delivery systems[Mesh] or Electronic non-nicotine delivery* or Electronic nicotine device* or Electronic non-nicotine device* or Vape or Vaping or Vapo* or E-hookah or Electronic inhalant device* or E-liquid)) AND (Smoker*[Mesh] or non-smoker*[Mesh] or ex-smoker*[Mesh] or Combustible cigarette or Tobacco smoking or Smoking or Cigarette or Cigarette smoking or Cigar smoking)) AND (Initiat* OR Uptak* OR Subsequent* OR Predict* OR Onset)                                                                                | 1187 (01/04/2020)       |
| Scopus           | ( TITLE-ABS-KEY ( ( "Electronic cigarette*" OR "E-cigarette*" OR "Electronic nicotine delivery system*" OR "Electronic non-nicotine delivery*" OR "Electronic nicotine device*" OR "Electronic non-nicotine device*" OR "Vape" OR "Vaping" OR "Vapo*" OR "E-hookah" ) ) AND TITLE-ABS-KEY ( ( "Smoker*" OR "non-smoker*" OR "ex-smoker*" OR "Combustible cigarette" OR "Tobacco smoking" OR "Smoking" OR "Cigarette" OR "Cigarette smoking" OR "Cigar smoking" ) ) AND TITLE-ABS-KEY ( ( "Initiat*" OR "Uptak*" OR "Subsequent*" OR "Predict*" OR "Onset" ) ) )                                      | 1289 (01/04/2020)       |
| Web of Science   | <b>ALL FIELDS:</b> (("Electronic cigarette*" OR E-cigarette* OR "Electronic nicotine delivery system*" OR "Electronic non-nicotine delivery*" OR "Electronic nicotine device*" OR "Electronic non-nicotine device*" OR Vape OR Vaping OR Vapo* OR E-hookah OR "Electronic inhalant device*)) <b>AND ALL FIELDS:</b> ((Smoker* OR non-smoker* OR ex-smoker* OR "Combustible cigarette" OR "Tobacco smoking" OR Smoking OR Cigarette OR "Cigarette smoking" OR "Cigar smoking")) <b>AND ALL FIELDS:</b> ((Initiat* OR Uptak* OR Subsequent* OR Predict* OR Onset))                                     | 1488 (01/04/2020)       |
| PsychINFO (Ovid) | 1. (Electronic cigarette* or E-cigarette* or Electronic nicotine delivery system* or Electronic non-nicotine delivery* or Electronic nicotine device* or Electronic non-nicotine device* or Vape or Vaping or Vapo* or E-hookah or Electronic inhalant device or E-liquid).af.<br>2. (Smoker* or non-smoker* or ex-smoker* or Combustible cigarette or Tobacco smoking or Smoking or Cigarette or Cigarette smoking or Cigar smoking).af.<br>3. (Initiat* or Uptak* or Subsequent* or Predict* or Onset).af.<br>4. 1 and 2 and 3                                                                     | 874 (01/04/2020)        |
| Medline (Ovid)   | 1 (Electronic cigarette* or E-cigarette* or Electronic nicotine delivery system* or Electronic non-nicotine delivery* or Electronic nicotine device* or Electronic non-nicotine device* or Vape or Vaping or Vapo* or E-hookah or Electronic inhalant device or E-liquid).af.<br>2 (Smoker* or non-smoker* or ex-smoker* or Combustible cigarette or Tobacco smoking or Smoking or Cigarette or Cigarette smoking or Cigar smoking).af.<br>3 (Initiat* or Uptak* or Subsequent* or Predict* or Onset).af.<br>4 1 and 2 and 3                                                                         | 1168 (04/02/2020)       |
| Cochrane         | 1. MeSH descriptor: [Electronic Nicotine Delivery Systems] explode all trees<br>2. ("Electronic cigarette" OR E-cigarette OR Vape OR Vaping OR E-hookah OR "Electronic inhalant device" OR E-liquid OR "Electronic Nicotine Delivery Systems"):ti,ab,kw<br>3. #1 OR #2<br>4. (Smoker* or non-smoker* or ex-smoker* or Combustible cigarette or Tobacco smoking or Smoking or Cigarette or Cigarette smoking or Cigar smoking):ti,ab,kw<br>5. #4 OR #5<br>6. (Initiat* OR Uptak* OR Subsequent* OR Progress* OR Predict* OR Duration OR Intens* OR Frequen* OR Onset):ti,ab,kw<br>7. #3 AND #6 AND #7 | 219 (01/04/2020)        |

**Supplementary Table 4: AMSTAR2[17] rating of included systematic review studies**

| Criteria                                                                                                                                                                                                           | Aladeokin & Haighton 2019[39] | Soneji et al. 2017[16] | Khouja et al. 2020[38] |
|--------------------------------------------------------------------------------------------------------------------------------------------------------------------------------------------------------------------|-------------------------------|------------------------|------------------------|
| 1. Did the research questions and inclusion criteria for the review include the components of PICO?                                                                                                                | Yes                           | Yes                    | Yes                    |
| 2. Did the report of the review contain an explicit statement that the review methods were established prior to the conduct of the review and did the report justify any significant deviations from the protocol? | Yes                           | No                     | Partial Yes            |
| 3. Did the review authors explain their selection of the study designs for inclusion in the review?                                                                                                                | Yes                           | Yes                    | Yes                    |
| 4. Did the review authors use a comprehensive literature search strategy?                                                                                                                                          | Partial Yes                   | Partial Yes            | Partial Yes            |
| 5. Did the review authors perform study selection in duplicate?                                                                                                                                                    | Yes                           | Yes                    | Yes                    |
| 6. Did the review authors perform data extraction in duplicate?                                                                                                                                                    | No                            | No                     | Yes                    |
| 7. Did the review authors provide a list of excluded studies and justify the exclusions?                                                                                                                           | No                            | No                     | No                     |
| 8. Did the review authors describe the included studies in adequate detail?                                                                                                                                        | Yes                           | Yes                    | Yes                    |
| 9. Did the review authors use a satisfactory technique for assessing the risk of bias (RoB) in individual studies that were included in the review?                                                                | Yes                           | Yes                    | Yes                    |
| 10. Did the review authors report on the sources of funding for the studies included in the review?                                                                                                                | No                            | No                     | No                     |
| 11. If meta-analysis was performed did the review authors use appropriate methods for statistical combination of results?                                                                                          | Yes                           | Yes                    | Yes                    |
| 12. If meta-analysis was performed, did the review authors assess the potential impact of RoB in individual studies on the results of the meta-analysis or other evidence synthesis?                               | Yes                           | Yes                    | Yes                    |
| 13. Did the review authors account for RoB in individual studies when interpreting/discussing the results of the review?                                                                                           | Yes                           | Yes                    | Yes                    |
| 14. Did the review authors provide a satisfactory explanation for, and discussion of, any heterogeneity observed in the results of the review?                                                                     | Yes                           | Yes                    | Yes                    |
| 15. If they performed quantitative synthesis did the review authors carry out an adequate investigation of publication bias (small study bias) and discuss its likely impact on the results of the review?         | No                            | Yes                    | Yes                    |
| 16. Did the review authors perform study selection in duplicate?                                                                                                                                                   | Yes                           | Yes                    | Yes                    |
| <b>Rating overall confidence in the results of the review</b>                                                                                                                                                      | Moderate                      | Moderate               | Moderate               |

### Supplementary Table 5: Primary research studies included in systematic reviews in the umbrella review that were included in the top-up systematic review

| Authors/<br>Year                             | Title                                                                                                                                      | Systematic<br>review(s)<br>included in              | Country and data<br>source(s)                   | Baseline<br>cigarette<br>use | E-cigarette<br>use | Follow up<br>cigarette use | Odds Ratio<br>(95% CI) | Adjusted Odds Ratio<br>(95% CI)  |
|----------------------------------------------|--------------------------------------------------------------------------------------------------------------------------------------------|-----------------------------------------------------|-------------------------------------------------|------------------------------|--------------------|----------------------------|------------------------|----------------------------------|
| Barrington-<br>Trimis et<br>al.,<br>2018[33] | E-cigarette Use and Subsequent Smoking Frequency Among Adolescents                                                                         | Khouja et al., 2020                                 | US<br>(CA, CT): CHS, HH,<br>YASS                | Never                        | Ever               | Ever                       | 3.80 (3.10 – 4.66)     | 4.57 (3.56 – 5.87)               |
| Best et al.,<br>2018[35]                     | Relationship between trying an electronic cigarette and subsequent cigarette experimentation in Scottish adolescents: a cohort study       | Aladeokin &<br>Haighton 2019<br>Khouja et al., 2020 | Scotland (UK):<br>School-based                  | Never                        | Ever               | Ever                       | 4.62 (3.34 – 6.38)     | 2.42 (1.63 – 3.60)               |
| East et al.,<br>2018[34]                     | The Association Between Smoking and Electronic Cigarette Use in a Cohort of Young People                                                   | Aladeokin &<br>Haighton 2019<br>Khouja et al., 2020 | England (UK):<br>AOSHGB                         | Never                        | Ever               | Ever                       | 12.31 (5.06 – 29.94)   | 10.57 (3.33 – 33.50)             |
| Leventhal<br>et al.,<br>2015[32]             | Association of Electronic Cigarette Use With Initiation of Combustible Tobacco Product Smoking in Early Adolescence                        | Khouja et al., 2020<br>Soneji et al., 2017          | US (LA): YBRS -<br>School-based                 | Never                        | Ever               | Ever                       | 2.95 (1.74 – 4.99)     | 1.75 (1.10 – 2.77)               |
| Loukas et<br>al.,<br>2018[14]                | Exclusive e-cigarette use predicts cigarette initiation among college students                                                             | Khouja et al., 2020                                 | US (TX): M-PACT                                 | Never                        | Ever               | Ever                       | 2.72 (2.10 – 3.53)     | 1.36 (1.01 – 1.83)               |
| Lozano et<br>al.,<br>2017[36]                | A longitudinal study of electronic cigarette use and onset of conventional cigarette smoking and marijuana use among Mexican adolescents   | Khouja et al., 2020                                 | Mexico: School-based                            | Never                        | Ever               | Ever                       | 2.46 (1.85 – 3.26)     | 1.60 (1.31 – 1.97)               |
| Miech et<br>al.,<br>2017[31]                 | E-cigarette use as a predictor of cigarette smoking: results from a 1-year follow-up of a national sample of 12th grade students           | Khouja et al., 2020<br>Soneji et al., 2017          | US: MTD 2014-2015                               | Never                        | Ever               | Ever                       | 6.32 (1.73 – 23.10)    | 6.58 (2.04 – 57.88) <sup>†</sup> |
| Primack et<br>al.,<br>2015[29]               | Progression to Traditional Cigarette Smoking After Electronic Cigarette Use Among US Adolescents and Young Adults                          | Khouja et al., 2020<br>Soneji et al., 2017          | US: Dartmouth media<br>survey 2012-2014         | Never                        | Ever               | Ever                       | 5.66 (1.99 – 16.07)    | 8.3 (1.2 – 58.6)                 |
| Primack et<br>al.,<br>2018[30]               | Initiation of Traditional Cigarette Smoking after Electronic Cigarette Use Among Tobacco-Naive US Young Adults                             | Khouja et al., 2020                                 | US: Growth from<br>Knowledge 2013-2014          | Never                        | Ever               | Ever                       | 6.06 (2.15 – 17.10)    | 6.82 (1.65 – 28.25)              |
| Spindle et<br>al.,<br>2017[28]               | Electronic cigarette use and uptake of cigarette smoking: A longitudinal examination of U.S. college students                              | Khouja et al., 2020<br>Soneji et al., 2017          | US: Mid-Atlantic<br>university (S4S<br>project) | Never                        | Ever               | Ever                       | 3.50 (2.41 – 5.09)     | 3.37 (1.91 – 5.94)               |
| Treur et al.,<br>2018[37]                    | E-cigarette and waterpipe use in two adolescent cohorts: cross-sectional and longitudinal associations with conventional cigarette smoking | Khouja et al., 2020                                 | Netherlands                                     | Never                        | Ever**             | Ever                       | 10.83 (8.87 – 13.22)   | 11.9 (3.36 – 42.11)              |

|                        |                                                                                                           |                                            |                       |                         |                      |                      |                    |                    |
|------------------------|-----------------------------------------------------------------------------------------------------------|--------------------------------------------|-----------------------|-------------------------|----------------------|----------------------|--------------------|--------------------|
| Unger et al., 2016[27] | E-cigarette use and subsequent cigarette and marijuana use among Hispanic young adults                    | Soneji et al., 2017                        | US (LA): Project RED  | No current <sup>a</sup> | Current <sup>a</sup> | Current <sup>a</sup> | 4.71 (2.27 – 9.77) | 3.32 (1.55 – 7.11) |
| Wills et al., 2017[26] | Longitudinal study of e-cigarette use and onset of cigarette smoking among high school students in Hawaii | Khouja et al., 2020<br>Soneji et al., 2017 | US (HI): School-based | Never                   | Ever                 | Ever                 | 4.25 (2.74 – 6.61) | 2.87 (2.03 – 4.05) |

### Supplementary Table 6: Newcastle Ottawa Scale[18] (NOS) rating of newly-identified primary research studies

| Study                               | Selection                                    |                                         |                               |                                                                              | Comparability                                                        | Outcome                   |                                                      |                                       | Total |
|-------------------------------------|----------------------------------------------|-----------------------------------------|-------------------------------|------------------------------------------------------------------------------|----------------------------------------------------------------------|---------------------------|------------------------------------------------------|---------------------------------------|-------|
|                                     | Representativeness of the Exposed Cohort (★) | Selection of the Non-Exposed Cohort (★) | Ascertainment of Exposure (★) | Demonstration That Outcome of Interest Was Not Present at Start of Study (★) | Comparability of Cohorts on the Basis of the Design or Analysis (★★) | Assessment of Outcome (★) | Was Follow-Up Long Enough for Outcomes to Occur (★)* | Adequacy of Follow Up of Cohorts (★)‡ |       |
| Aleyan et al., 2019 [23]            | ★                                            | ★                                       |                               | ★                                                                            | ★★                                                                   |                           | ★                                                    |                                       | 6     |
| Barrington-Trimis et al., 2019 [43] | ★                                            | ★                                       |                               | ★                                                                            | ★★                                                                   |                           | ★                                                    | ★                                     | 7     |
| Berry et al., 2019 [21]             | ★                                            | ★                                       | ★                             | ★                                                                            | ★★                                                                   |                           | ★                                                    | ★                                     | 8     |
| Bold et al., 2018 [40]              | ★                                            | ★                                       |                               | ★                                                                            | ★                                                                    |                           | ★                                                    |                                       | 5     |
| Brose et al., 2019 [25]             | ★                                            | ★                                       |                               | ★                                                                            | ★★                                                                   |                           | ★                                                    |                                       | 6     |
| Chien et al., 2019 [22]             | ★                                            | ★                                       |                               | ★                                                                            | ★★                                                                   |                           | ★                                                    | ★                                     | 7     |
| Conner et al., 2019 [42]            | ★                                            | ★                                       |                               | ★                                                                            | ★★                                                                   |                           | ★                                                    |                                       | 6     |
| Dai et al., 2019 [46]               | ★                                            | ★                                       | ★                             | ★                                                                            | ★★                                                                   |                           | ★                                                    | ★                                     | 8     |
| Kinnunen et al., 2019 [24]          | ★                                            | ★                                       |                               | ★                                                                            | ★★                                                                   |                           | ★                                                    |                                       | 6     |
| McMillen et al., 2019 [45]          | ★                                            | ★                                       | ★                             | ★                                                                            | ★★                                                                   |                           | ★                                                    | ★                                     | 8     |
| Osibogun et al., 2020[44]           | ★                                            | ★                                       | ★                             | ★                                                                            | ★★                                                                   |                           | ★                                                    | ★                                     | 8     |
| Pénzes et al., 2018 [41]            | ★                                            | ★                                       |                               | ★                                                                            | ★★                                                                   |                           | ★                                                    |                                       | 6     |

\* 6 months considered adequate follow-up time

‡ Studies with less than 30% loss to follow-up considered adequate

## Supplementary Table 7: Study characteristics from newly-identified studies for the top-up systematic review

| Study                               | Country and data source                        | Study design                                | Duration (follow up and date range) | Study population<br>- sample size<br>- baseline age/ grade<br>- % female                           | Consideration of confounding                                                                                                                                                                                                                                                                                               | NOS <sup>1</sup> score |
|-------------------------------------|------------------------------------------------|---------------------------------------------|-------------------------------------|----------------------------------------------------------------------------------------------------|----------------------------------------------------------------------------------------------------------------------------------------------------------------------------------------------------------------------------------------------------------------------------------------------------------------------------|------------------------|
| Aleyan et al., 2019 [23]            | Canada (COMPASS Waves 1-3)                     | Longitudinal cohort                         | 36 months (2014 to 2017)            | - 6,729<br>- 9 <sup>th</sup> or 10 <sup>th</sup> grade<br>- 54.2% female                           | Gender, grade, ethnicity, friends that smoke, weekly spending money, current cannabis use, and current binge drinking at each wave                                                                                                                                                                                         | 6                      |
| Barrington-Trimis et al., 2019 [43] | US (CT and CA); CHS; HH; YASS <sup>1</sup>     | Longitudinal cohort                         | 12 months (2013 to 2015)            | - 6,258<br>- Grades 9 to 12<br>- 53.5% female                                                      | Gender, grade, and cohort (CHS, H&H, YASS), school (H&H/YASS) or community (CHS)                                                                                                                                                                                                                                           | 7                      |
| Berry et al., 2019 [21]             | US (PATH <sup>3</sup> Waves 1-3)               | Longitudinal cohort                         | 24 months (2013 to 2016)            | - 6,123<br>- 12-15 years old, mean 13.4 years (SD 1.2)<br>- 49.5% female                           | Age, gender, income, race and ethnicity, parental education, urban residence, living with a tobacco user, frequency of noticing health warnings on cigarette packages, and ability to recall a favourite tobacco advertisement. Risk-taking behaviours, sensation-seeking personality traits, and cigarette susceptibility | 8                      |
| Bold et al., 2018 [40]              | US (CT)                                        | Longitudinal cohort                         | 36 months (2013 to 2015)            | - 808<br>- Mean 15.04 years (SD 0.90)<br>- 53% female                                              | School, sociodemographic characteristics (sex, race/ethnicity, SES), and use of other tobacco products.                                                                                                                                                                                                                    | 5                      |
| Brose et al., 2019 [25]             | UK (National web-based survey 2012-2017)       | Longitudinal cohort                         | 12 months (2016 to 2017)            | - 374<br>- Mean 49.2 years (SD 14.1)<br>- 44% female                                               | Time quit smoking, vaping status, gender, income and NRT use                                                                                                                                                                                                                                                               | 6                      |
| Chien et al., 2019 [22]             | Taiwan (TAALS <sup>4</sup> Waves 1-2)          | Longitudinal cohort                         | 24 months (2014 to 2016)            | - 12,954<br>- 36.9% ever smokers female; 58.1% never smokers female                                | Smoking susceptibility at baseline, socio-demographic profile, psychological status, and peer support.                                                                                                                                                                                                                     | 7                      |
| Conner et al., 2019 [42]            | UK (England); RCT Waves 3 and 5                | Post-hoc analysis of a cluster RCT          | 24 months (2014 – 2016)             | - 3,994<br>- 13 to 14 years old<br>- 52.3% female                                                  | Sociodemographic (gender, ethnicity, family affluence, percentage of children per school eligible for free school meals); friends' smoking status, family smoking, impulsiveness                                                                                                                                           | 6                      |
| Dai et al., 2019 [46]               | US (PATH <sup>3</sup> Waves 1-2)               | Longitudinal cohort                         | 12 months (2013 to 2015)            | - 4,094<br>- Adults (≥18 years)<br>- 45.9% female                                                  | Sociodemographic (age, sex, race, education, poverty level, region, and health insurance) and tobacco use characteristics (smoking chronicity, typical number of combustible cigarettes smoked per day during the period of regular smoking, and length of time since quit smoking)                                        | 8                      |
| Kinnunen et al., 2019 [24]          | Finland (MetLoFIN <sup>5</sup> (school-based)) | Longitudinal cohort                         | 18 months (2014 to 2016)            | - 3,474<br>- Grade 9 (ages 15 to 16 years)<br>- 51.8% female                                       | Gender, socioeconomic background, parents' education, other tobacco product and drug use, school clustering. Crude and adjusted logistic regressions were also conducted with the Firth's bias-reduced logistic regression                                                                                                 | 6                      |
| McMillen et al., 2019 [45]          | US (PATH <sup>3</sup> Waves 1-2)               | Longitudinal cohort                         | 12 months (2013 to 2015)            | - 8,108<br>- Adults (≥18 years)<br>- 54.4% distant former smoker female; 40.0% never smoker female | Sociodemographic (race/ethnicity, sex, age, education); psychosocial predictors of combustible cigarette smoking risk (household smoking rules and living with someone who smokes)                                                                                                                                         | 8                      |
| Osibogun et al., 2020 [44]          | US (PATH <sup>3</sup> Waves 1-3)               | Longitudinal cohort                         | 36 months (2013 to 2016)            | - 14,623<br>- Ages 12-17 years<br>- 48% female                                                     | Sociodemographic and tobacco-related factors                                                                                                                                                                                                                                                                               | 8                      |
| Pénzes et al., 2018 [41]            | Romania (ASPIRA <sup>6</sup> RCT)              | Secondary analysis from data in cluster RCT | 6 months (2014 to 2015)             | - 1,369<br>- Grade 9, mean 14.88 (SD 0.48)                                                         | Intervention/control condition, gender, age, the design effect due to the cluster sampling and used schools as cluster units                                                                                                                                                                                               | 6                      |

<sup>1</sup> NOS: Newcastle-Ottawa Scale (out of a total of 10)

<sup>2</sup> CHS: Children's Health Study; HH: Happiness & Health Study; YASS: Yale Adolescent Survey Study

<sup>3</sup> PATH: Population Assessment of Tobacco and Health Study

<sup>4</sup> TAALS: The Taiwan Adolescent to Adult Longitudinal Study

<sup>5</sup> MetLoFIN: Metropolitan Longitudinal Finland

<sup>6</sup> ASPIRA: A Smoking Prevention Interactive Experience [Roman acronym for translation of ASPIRE]



## Supplementary Figure 1: Funnel plots to assess the risk of bias across studies

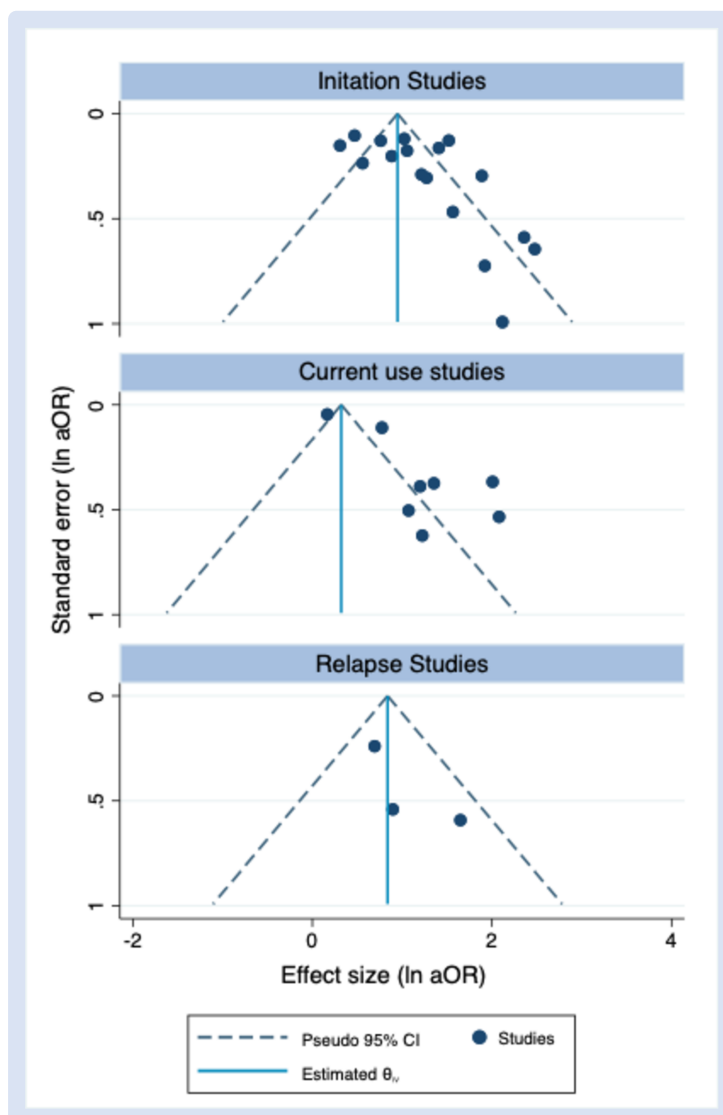

Figure: Funnel plots with pseudo 95% confidence limits
